# Supplementary material for: Observation of lithium stripping in super-concentrated electrolyte at potentials lower than regular Li stripping
Source: Royal Society of Chemistry journal article supplement (doi:10.1039/d1ra01490k), 2021-01-01
Supplement: d1ra01490k1.pdf [file d1ra01490k1.pdf]

## Supplementary information

Observation of lithium stripping in super-concentrated electrolyte at potentials lower than regular Li stripping

Tohru Shiga\*, Yumi Masuoka, and Hiroshi Nozakio

Toyota Central Research & Development Laboratories Inc.

Yokomichi, Nagakute-city, Aichi-ken, 480-1192 Japan

\*E-mail: e0560@mosk.tytlabs.co.jp

### 1. Materials

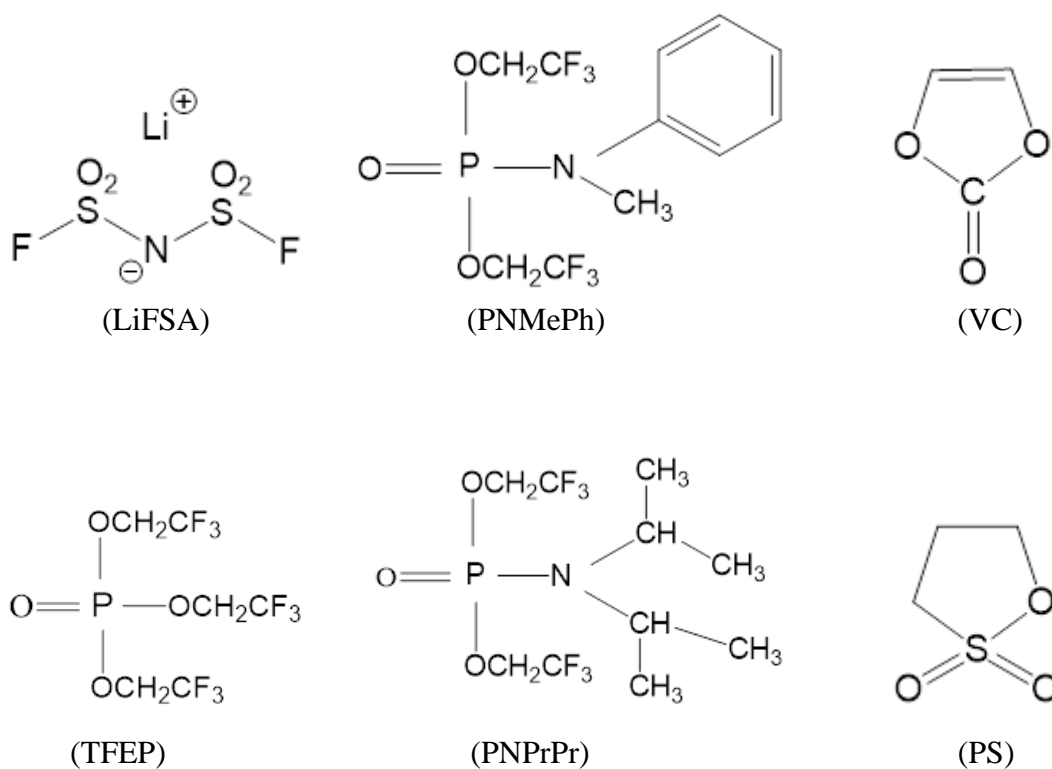

**Figure S1.** Chemical structures of materials.

## 2. Experimental

### 2.1. Electrode

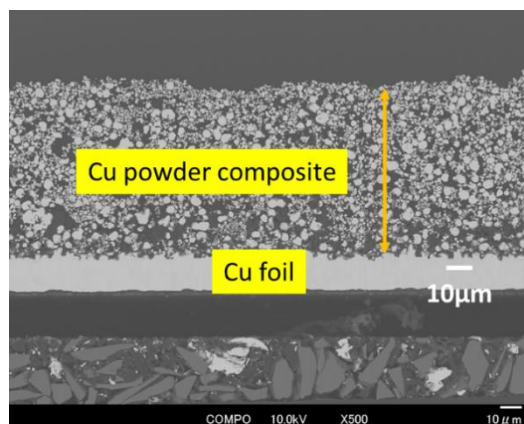

**Figure S2.** FE-SEM image of the cross section of a Cu powder electrode.

### 2.2. Electrochemical cell

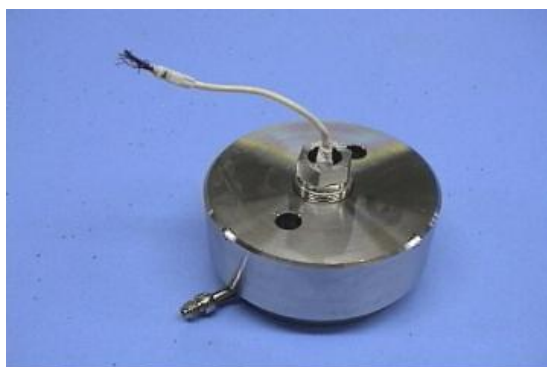

**Figure S3.** Photograph of an electrochemical cell.

**Table S1.**  $^7\text{Li}$ -NMR measurement parameters

|                       |                                                         |
|-----------------------|---------------------------------------------------------|
| Measurement frequency | 155.5080156 MHz                                         |
| Spectral width        | 100 kHz                                                 |
| Pulse width           | 1.0 $\mu\text{m}$ (30° pulse)                           |
| Pulse repetition time | 12 s                                                    |
| Observation point     | 8192 points                                             |
| Reference material    | 1M LiCl aqueous solution                                |
| Temperature           | Room temperature                                        |
| Rotational frequency  | 0 Hz                                                    |
| Sample tube property  | ZrO <sub>2</sub> , inner diameter 1 mm<br>Length 2.5 mm |

### 3. Results

#### 3.1. Li plating behavior for the cell fabricated using only Cu powder

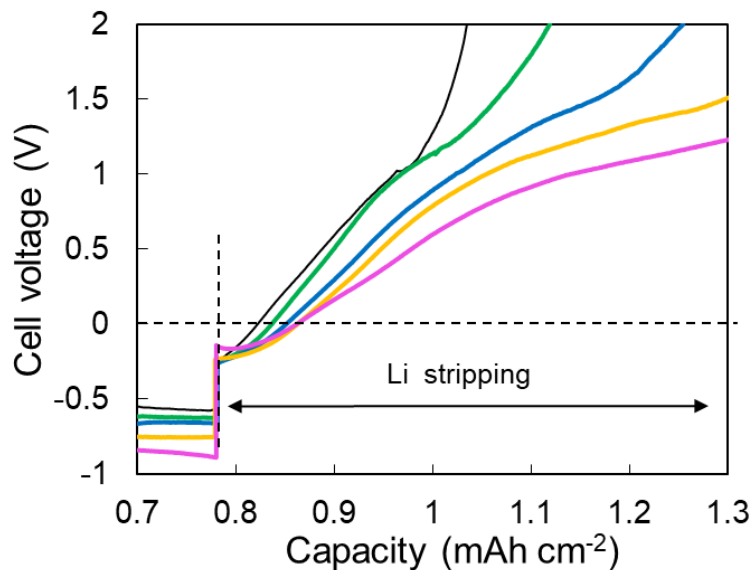

**Figure S4.** Cu electrode potential-capacity curve for the electrode fabricated using only Cu powder during the initial stage of Li stripping.

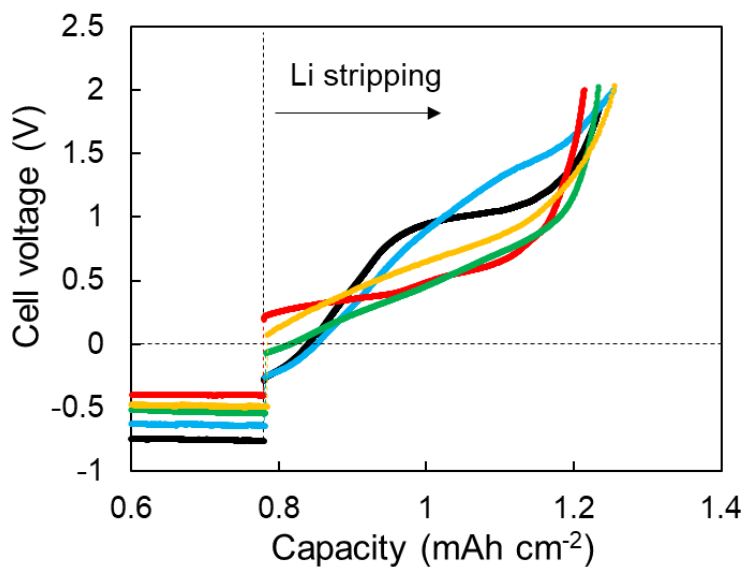

**Figure S5.** Cell voltage-capacity curves for the cells using various LiFSA concentrations during the initial stage of Li stripping; [LiFSA]/[PNMePh] = 0.125 (red), 0.2 (orange), 0.25 (green), 0.33 (blue), and 0.4 (black).

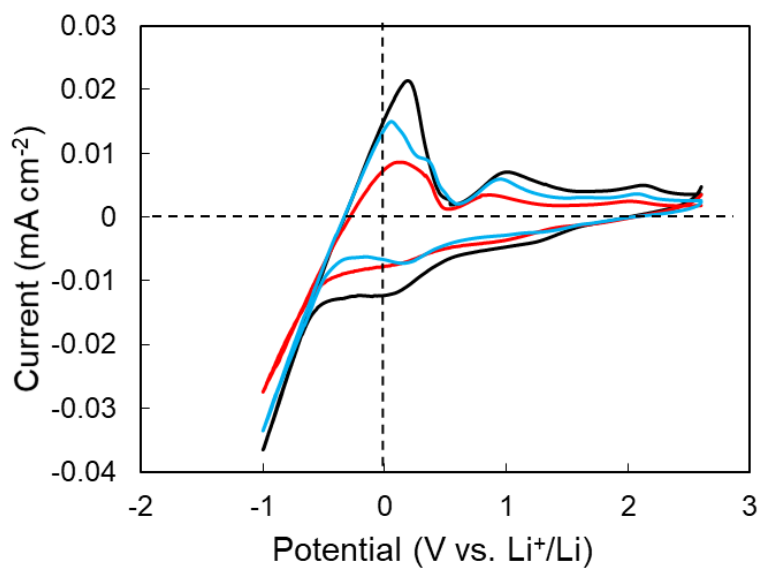

**Figure S6.** CV curves for the cell using Cu powder electrode under various sweep rates; 0.1 mV s<sup>-1</sup> (red), 0.2 mV s<sup>-1</sup> (blue), and 0.5 mV s<sup>-1</sup> (black).

### 3.4. Li plating/stripping test in some electrolytes

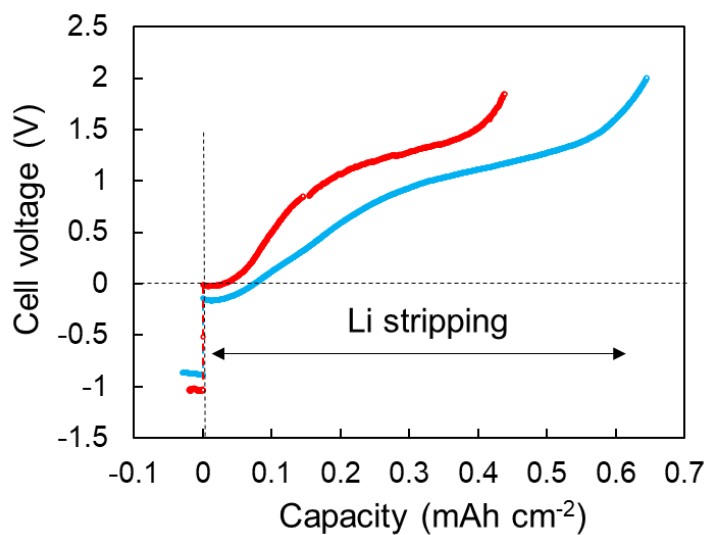

**Figure S7.** 3<sup>rd</sup> cycle voltage-capacity curves for the cells using the super-concentrated electrolytes with powder (blue) and only Cu foil (red) VC during the Li stripping process.

### 3.5. Chemical structure of SEI associated with VC

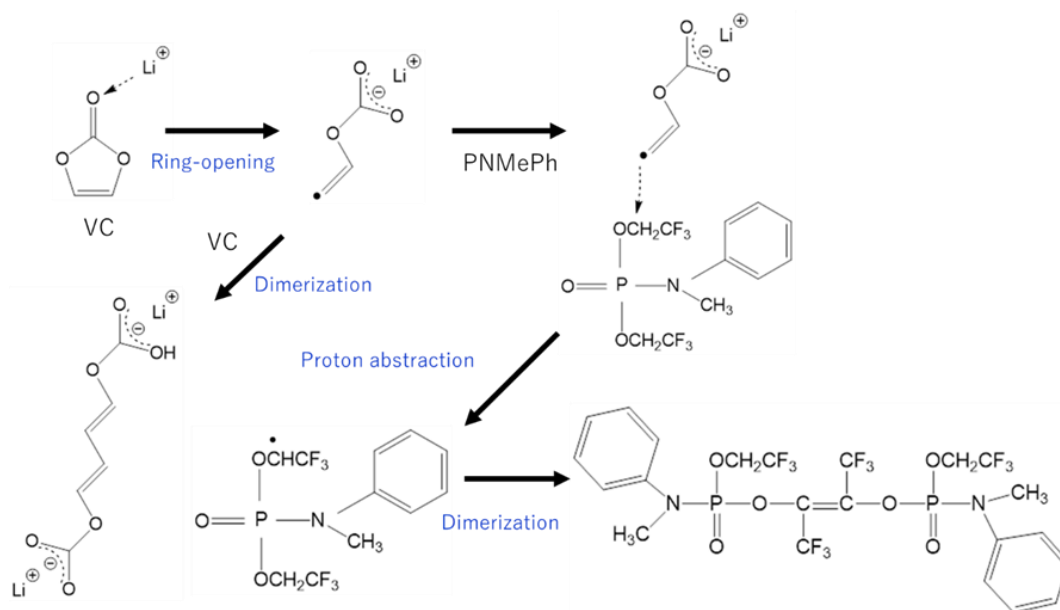

**Figure S8.** Reaction scheme for SEI formation.

### 3.6. $^7\text{Li}$ -NMR results

The broad signal at approximately 0 ppm provided information on the  $\text{Li}^+$  ions in LiFSA and Li compounds that result from the reductive decomposition of the electrolyte by metallic Li. Waveform deconvolution was performed for the broad NMR peak at ca. 0 ppm. The NMR waveform was deconvoluted into three waves with peaks at  $-0.63$  ppm,  $-1.32$  ppm, and  $3.25$  ppm, the percentages of which were 32%, 14%, and 54%, respectively. The wave with the peak at  $-1.32$  ppm is attributed to  $\text{Li}^+$  ions in the LiFSA/PNMePh electrolyte because it was observed in the spectrum of the pristine sample before the Li plating test. The other two waves reflected reductive decomposition. Letellier et al.<sup>1</sup> studied the SEI with a  $\text{LiPF}_6/(\text{EC}+\text{DMC})$  electrolyte using  $^7\text{Li}$ -NMR and identified  $\text{Li}_2\text{CO}_3$ , LiF,  $\text{Li}_2\text{O}$ , LiOH, and  $\text{ROCO}_2\text{Li}$  as SEI components. The  $^7\text{Li}$ -NMR signal of LiF appears between 0 and  $-1$  ppm; therefore, the wave with the peak at  $-0.63$  ppm in this study may be due to an analogue of LiF. The  $^7\text{Li}$ -NMR signal of  $\text{Li}_2\text{CO}_3$  was detected at  $3.89$  ppm; therefore, the Li compound with a peak at  $3.25$  ppm is most likely an oxide.

- (1) Letellier, M.; Chevallier, F.; Morcrette, M. In Situ  $^7\text{Li}$ -Nuclear Magnetic Resonance Observation of the Electrochemical Intercalation of Lithium in Graphite; 1<sup>st</sup> Cycle. *Carbon*, **2007**, *45*, 1025-1034.

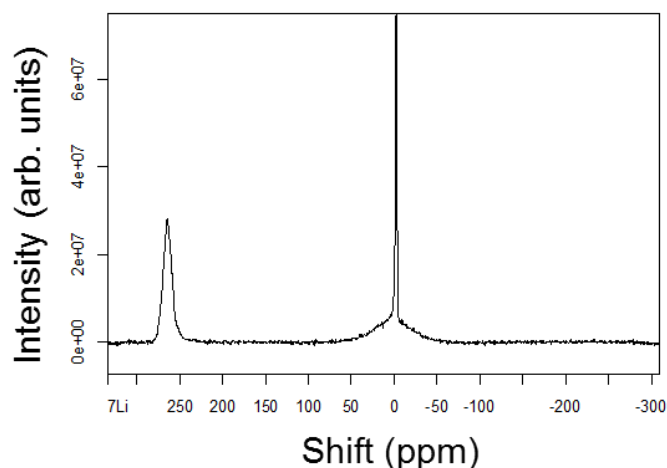

**Figure S9.**  $^7\text{Li}$ -NMR spectrum for a Cu powder electrode after Li plating.



### 3.7. EDX results

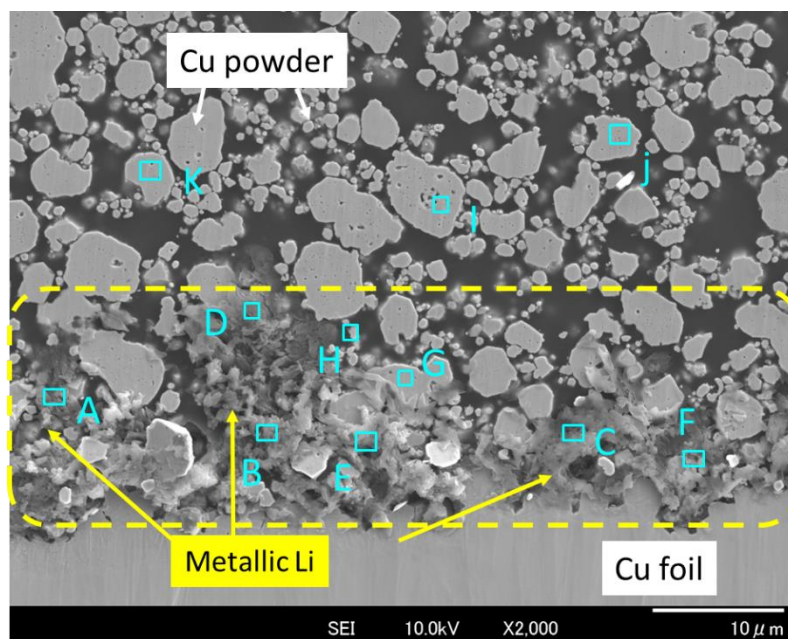

**Figure S10.** EDX measurement points on the Cu powder electrode after Li plating.

**Table S2.** EDX results for the Cu powder electrode after Li plating

| No. | C    | O    | F   | Cu   | O/C   |
|-----|------|------|-----|------|-------|
| A   | 39.8 | 55.8 | 0.1 | 4.3  | 1.41  |
| B   | 75.9 | 29.5 | 0.3 | 4.4  | 0.39  |
| C   | 54.2 | 26.9 | 0.2 | 18.7 | 0.49  |
| D   | 35.8 | 60.5 | 0.1 | 3.6  | 1.69  |
| E   | 42.4 | 34.1 | 0.3 | 23.1 | 0.81  |
| F   | 40.3 | 52   | 0.2 | 7.5  | 1.29  |
| G   | 12.6 | 0.9  | 0   | 86.3 | 0.071 |
| H   | 24.6 | 0.9  | 0   | 74.5 | 0.037 |
| I   | 11.2 | 0.2  | 0   | 88.6 | 0.018 |
| J   | 13.1 | 1.6  | 0   | 85.3 | 0.122 |
| K   | 13.5 | 2    | 0   | 84.6 | 0.148 |

### 3.8. EIS results for the cell using Cu powder

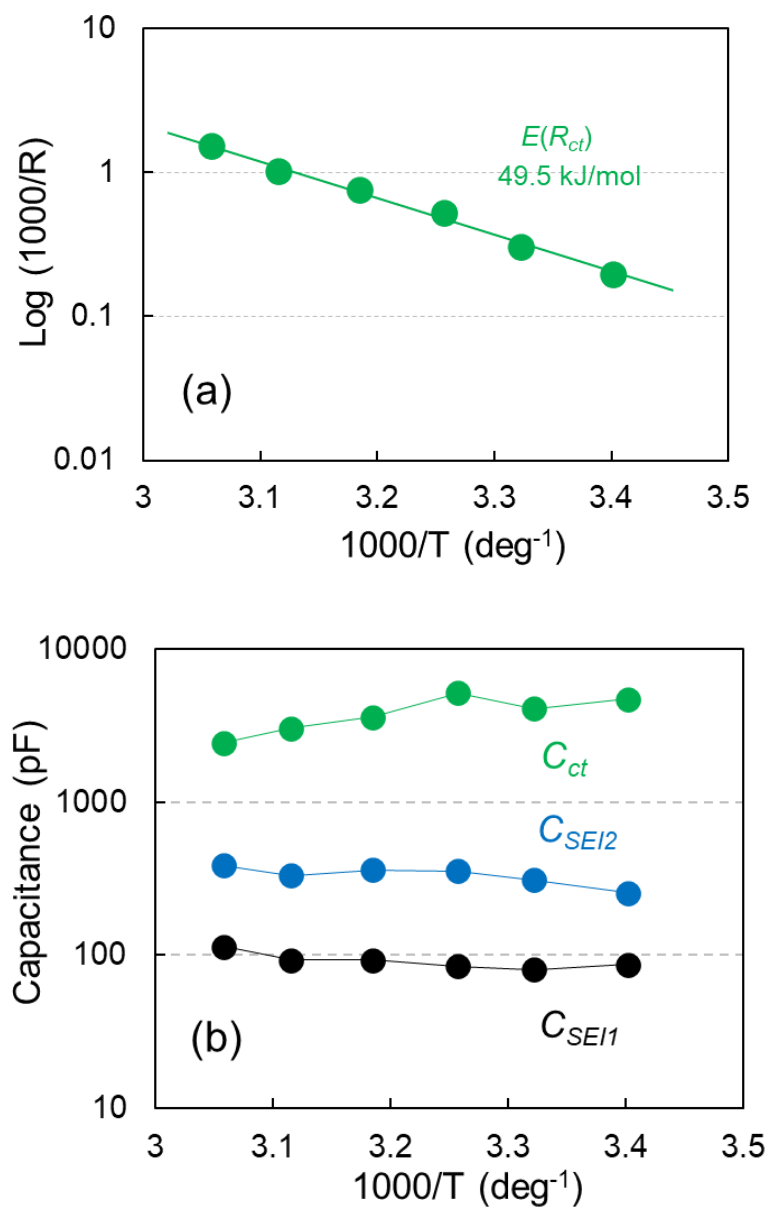

**Figure S11.** (a) Arrhenius plots of  $1/R_{ct}$ , and (b)  $C_{SEI1}$ ,  $C_{SEI2}$ , and  $C_{ct}$

### 3.9. Relaxation and EIS results for the cell using only Cu foil

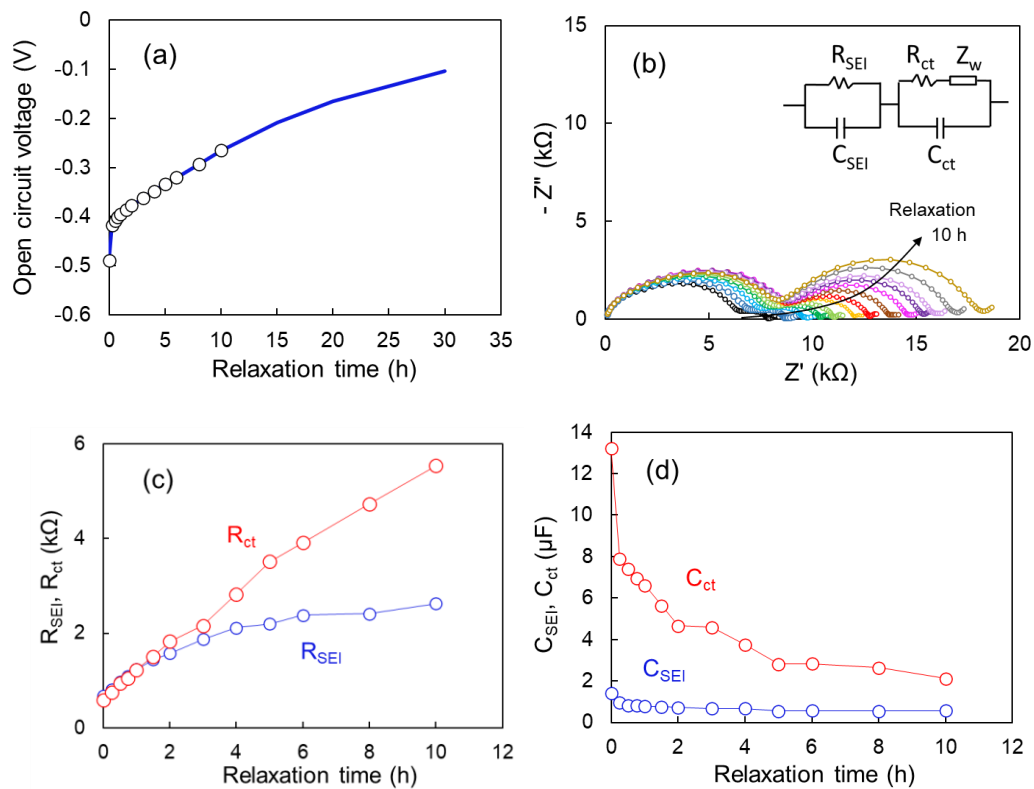

**Figure S12.** (a) OCV relaxation of the cells using the super-concentrated electrolytes with VC after Li plating, and (b) Nyquist plots, (c) Resistance factors, and (d) Electrical capacitances during OCV relaxation; relaxation time from t=0 h to 10 h,

### 3.10. Viscosity of the electrolyte

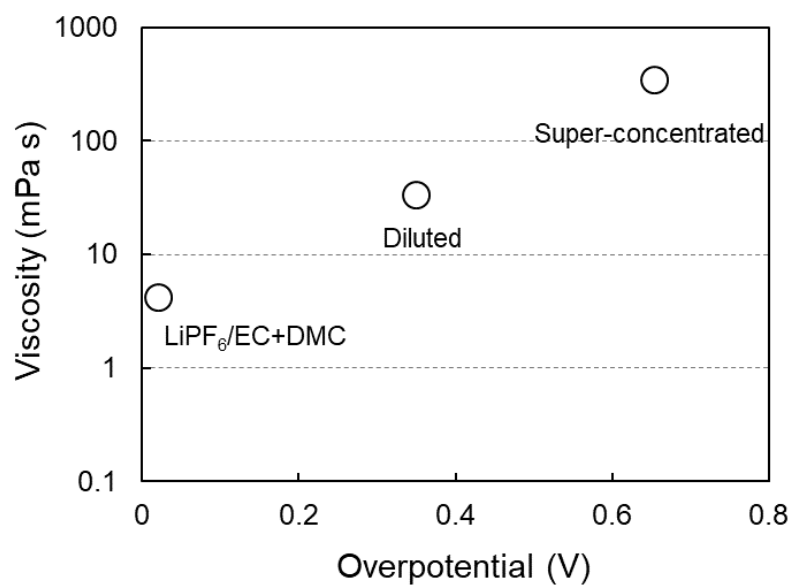

**Figure S13.** Relationship between viscosity of the electrolyte and overpotential during Li plating.

### 3.11. Energy diagram for Li deposition

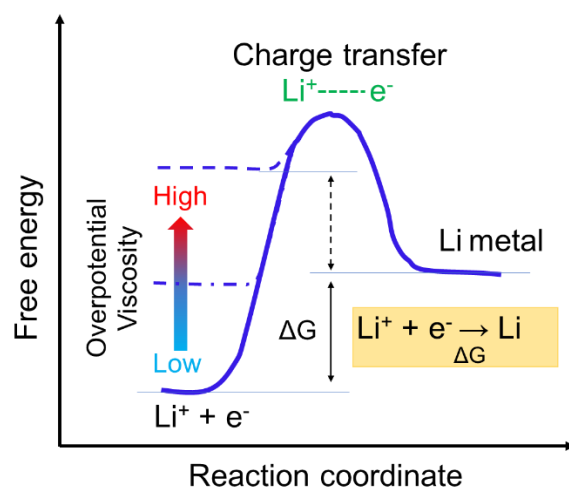

**Figure S14.** Energy diagram during Li plating: Relationship between viscosity of the electrolyte and overpotential.
